# Supplementary material
Source: ML conference proceedings conference paper supplement (https://proceedings.mlr.press/v37/tagorti15.html)
Supplement: Supplementary file [file tagorti15-supp.pdf]

## Supplementary Material

**A. Proof of Lemma 2**

We begin by bounding, for any value of  $m$ , the distance between  $\hat{G}$  and  $\hat{G}^m$ . Set  $m$  to any integer greater or equal to 1. Writing

$$\begin{aligned} \epsilon_1 &= \frac{1}{n-1} \sum_{i=1}^{m-1} G_i - \mathbb{E}[G_i] \\ \text{and } \epsilon_2 &= \frac{1}{n-1} \sum_{i=m}^{n-1} (z_i - z_i^m) \tau(X_i, X_{i+1})^T - \mathbb{E}[(z_i - z_i^m) \tau(X_i, X_{i+1})^T], \end{aligned}$$

we have

$$\begin{aligned} \frac{1}{n-1} \sum_{i=1}^{n-1} G_i - \mathbb{E}[G_i] &= \frac{1}{n-1} \sum_{i=m}^{n-1} G_i - \mathbb{E}[G_i] + \epsilon_1 \\ &= \frac{1}{n-1} \sum_{i=m}^{n-1} z_i \tau(X_i, X_{i+1})^T - \mathbb{E}[z_i \tau(X_i, X_{i+1})^T] + \epsilon_1 \\ &= \frac{1}{n-1} \sum_{i=m}^{n-1} z_i^m \tau(X_i, X_{i+1})^T - \mathbb{E}[z_i^m \tau(X_i, X_{i+1})^T] + (\epsilon_1 + \epsilon_2) \\ &= \frac{1}{n-1} \sum_{i=m}^{n-1} (G_i^m - \mathbb{E}[G_i^m]) + (\epsilon_1 + \epsilon_2). \end{aligned} \quad (23)$$

For all  $i$ , we have  $\|z_i\|_\infty \leq \frac{L}{1-\lambda\gamma}$ ,  $\|G_i\|_\infty \leq \frac{LL'}{1-\lambda\gamma}$ , and  $\|z_i - z_i^m\|_\infty \leq \frac{(\lambda\gamma)^m L}{1-\lambda\gamma}$ . As a consequence—using  $\|M\|_2 \leq \|M\|_F = \sqrt{d \times k} \|x\|_\infty$  for  $M \in \mathbb{R}^{d \times k}$  with  $x$  the vector obtained by concatenating all  $M$  columns—, we can see that

$$\|\epsilon_1 + \epsilon_2\|_2 \leq \frac{2(m-1)\sqrt{d \times k} LL'}{(n-1)(1-\lambda\gamma)} + \frac{2(\lambda\gamma)^m \sqrt{d \times k} LL'}{(1-\lambda\gamma)} \quad (24)$$

By concatenating all its columns, the  $d \times k$  matrix  $G_i^m$  may be seen a single vector  $U_i^m$  of size  $dk$ . Then, for all  $\epsilon > 0$ ,

$$\begin{aligned} \mathbb{P} \left( \left\| \frac{1}{n-m} \sum_{i=m}^{n-1} (G_i^m - \mathbb{E}[G_i^m]) \right\|_2 \geq \epsilon \right) &\leq \mathbb{P} \left( \left\| \frac{1}{n-m} \sum_{i=m}^{n-1} (G_i^m - \mathbb{E}[G_i^m]) \right\|_F \geq \epsilon \right) \\ &= \mathbb{P} \left( \left\| \frac{1}{n-m} \sum_{i=m}^{n-1} (U_i^m - \mathbb{E}[U_i^m]) \right\|_2 \geq \epsilon \right). \end{aligned} \quad (25)$$

The process  $(U_n^m)_{n \geq m}$ , defined as a function of the process  $(Z_n)_{n \geq m} = (X_{n-m+1}, X_{n-m+2}, \dots, X_{n+1})_{n \geq m}$ , is stationary. By using the next lemma, we can see that it inherits in some sense the  $\beta$ -mixing property of the process  $(X_i)_{i \geq 1}$  (Assumption 2).

**Lemma 5** (originally stated as Lemma 3). *Let  $(X_n)_{n \geq 1}$  be a  $\beta$ -mixing process, then  $(Z_n)_{n \geq m} = (X_{n-m+1}, X_{n-m+2}, \dots, X_{n+1})_{n \geq m}$  is a  $\beta$ -mixing process such that its  $i^{\text{th}}$   $\beta$  mixing coefficient  $\beta_i^Z$  satisfies  $\beta_i^Z \leq \beta_{i-m}^X$ .*

*Proof.* Let  $\Gamma = \sigma(Z_m, \dots, Z_t)$ , by definition we have

$$\Gamma = \sigma(Z_j^{-1}(B) : j \in \{m, \dots, t\}, B \in \sigma(\mathcal{X}^{m+1})).$$

For all  $j \in \{m, \dots, t\}$  we have

$$Z_j^{-1}(B) = \{\omega \in \Omega, Z_j(\omega) \in B\}.$$

For  $B = B_0 \times \dots \times B_m$ , we observe that

$$Z_j^{-1}(B) = \{\omega \in \Omega, X_{j-m+1}(\omega) \in B_0, \dots, X_{j+1}(\omega) \in B_m\}.$$

Then we have

$$\Gamma = \sigma(X_j^{-1}(B) : j \in \{m, \dots, t\}, B \in \sigma(\mathcal{X})) = \sigma(X_1, \dots, X_{t+1}).$$

Similarly we can prove that  $\sigma(Z_{t+i}^\infty) = \sigma(X_{t+i-m+1}^\infty)$ . Then let  $\beta_i^X$  be the  $i^{\text{th}}$   $\beta$ -mixing coefficient of the process  $(X_n)_{n \geq 1}$ , we have

$$\beta_i^X = \sup_{t \geq 1} \mathbb{E} \left[ \sup_{B \in \sigma(X_{t+i}^\infty)} |P(B|\sigma(X_1, \dots, X_t)) - P(B)| \right].$$

Similarly for the process  $(Z_n)_{n \geq m}$  we can see that

$$\beta_i^Z = \sup_{t \geq m} \mathbb{E} \left[ \sup_{B \in \sigma(Z_{t+i}^\infty)} |P(B|\sigma(Z_m, \dots, Z_t)) - P(B)| \right].$$

By applying what we developed above we obtain

$$\beta_i^Z = \sup_{t \geq m} \mathbb{E} \left[ \sup_{B \in \sigma(X_{t+i-m+1}^\infty)} |P(B|\sigma(X_1, \dots, X_{t+1})) - P(B)| \right].$$

Denote  $u = t + 1$  we have

$$\beta_i^Z = \sup_{u \geq m+1} \mathbb{E} \left[ \sup_{B \in \sigma(X_{u+i-m}^\infty)} |P(B|\sigma(X_1, \dots, X_u)) - P(B)| \right]$$

Then for  $i > m$

$$\beta_i^Z \leq \beta_{i-m}^X.$$

□

Now that we know that  $(U_n^m)_{n \geq m}$  is a  $\beta$ -mixing stationary process, we shall use the decomposition technique proposed by Yu (1994) that consists in dividing the sequence  $U_m^m, \dots, U_{n-1}^m$  into  $2\mu_{n-m}$  blocks of length  $a_{n-m}$  (we assume here that  $n - m = 2a_{n-m}\mu_{n-m}$ ). The blocks are of two kinds: those which contains the even indexes  $E = \cup_{l=1}^{\mu_{n-m}} E_l$  and those with odd indexes  $H = \cup_{l=1}^{\mu_{n-m}} H_l$ . Thus, by grouping the variables into blocks we get

$$\begin{aligned} & \mathbb{P} \left( \left\| \frac{1}{n-m} \sum_{i=m}^{n-1} U_i^m - \mathbb{E}[U_i^m] \right\|_2 \geq \epsilon \right) \\ & \leq \mathbb{P} \left( \left\| \sum_{i \in H} U_i^m - \mathbb{E}[U_i^m] \right\|_2 + \left\| \sum_{i \in E} U_i^m - \mathbb{E}[U_i^m] \right\|_2 \geq (n-m) \frac{\epsilon}{2} \right) \end{aligned} \quad (26)$$

$$\leq \mathbb{P} \left( \left\| \sum_{i \in H} U_i^m - \mathbb{E}[U_i^m] \right\|_2 \geq \frac{(n-m)\epsilon}{4} \right) + \mathbb{P} \left( \left\| \sum_{i \in E} U_i^m - \mathbb{E}[U_i^m] \right\|_2 \geq \frac{(n-m)\epsilon}{4} \right) \quad (27)$$

$$= 2\mathbb{P} \left( \left\| \sum_{i \in H} U_i^m - \mathbb{E}[U_i^m] \right\|_2 \geq \frac{(n-m)\epsilon}{4} \right) \quad (28)$$

where Equation (26) follows from the triangle inequality, Equation (27) from the fact that the event  $\{X + Y \geq a\}$  implies  $\{X \geq \frac{a}{2}\}$  or  $\{Y \geq \frac{a}{2}\}$ , and Equation (28) from the assumption that the process is stationary. Since  $H = \cup_{l=1}^{\mu_{n-m}} H_l$  we have

$$\begin{aligned} \mathbb{P} \left( \left\| \frac{1}{n-m} \sum_{i=m}^{n-1} U_i^m - \mathbb{E}[U_i^m] \right\|_2 \geq \epsilon \right) &\leq 2\mathbb{P} \left( \left\| \sum_{l=1}^{\mu_{n-m}} \sum_{i \in H_l} U_i^m - \mathbb{E}[U_i^m] \right\|_2 \geq \frac{(n-m)\epsilon}{4} \right) \\ &= 2\mathbb{P} \left( \left\| \sum_{l=1}^{\mu_{n-m}} U(H_l) - \mathbb{E}[U(H_l)] \right\|_2 \geq \frac{(n-m)\epsilon}{4} \right) \end{aligned} \quad (29)$$

where we defined  $U(H_l) = \sum_{i \in H_l} U_i^m$ . Now consider the sequence of identically distributed independent blocks  $(U'(H_l))_{l=1, \dots, \mu_{n-m}}$  such that each block  $U'(H_l)$  has the same distribution as  $U(H_l)$ . We are going to use the following technical result.

**Lemma 6.** (Yu, 1994) *Let  $X_1, \dots, X_n$  be a sequence of samples drawn from a stationary  $\beta$ -mixing process with coefficients  $\{\beta_i\}$ . Let  $X(H) = (X(H_1), \dots, X(H_{\mu_{n-m}}))$  where for all  $j$   $X(H_j) = (X_i)_{i \in H_j}$ . Let  $X'(H) = (X'(H_1), \dots, X'(H_{\mu_{n-m}}))$  with  $X'(H_j)$  independent and such that for all  $j$ ,  $X'(H_j)$  has same distribution as  $X(H_j)$ . Let  $Q$  and  $Q'$  be the distribution of  $X(H)$  and  $X'(H)$  respectively. For any measurable function  $h : \mathcal{X}^{a_n \mu_n} \rightarrow \mathbb{R}$  bounded by  $B$ , we have*

$$|\mathbb{E}_Q[h(X(H))] - \mathbb{E}_{Q'}[h(X'(H))]| \leq B\mu_n\beta_{a_n}.$$

By applying Lemma 6, Equation (29) leads to:

$$\begin{aligned} \mathbb{P} \left( \left\| \frac{1}{n-m} \sum_{i=m}^{n-1} U_i^m - \mathbb{E}[U_i^m] \right\|_2 \geq \epsilon \right) &\leq 2\mathbb{P} \left( \left\| \sum_{l=1}^{\mu_{n-m}} U'(H_l) - \mathbb{E}[U'(H_l)] \right\|_2 \geq \frac{(n-m)\epsilon}{4} \right) \\ &\quad + 2\mu_{n-m}\beta_{a_{n-m}}. \end{aligned} \quad (30)$$

The variables  $U'(H_l)$  are independent. Furthermore, it can be seen that  $(\sum_{l=1}^{\mu_{n-m}} U'(H_l) - \mathbb{E}[U'(H_l)])_{\mu_{n-m}}$  is a  $\sigma(U'(H_1), \dots, U'(H_{\mu_{n-m}}))$  martingale:

$$\begin{aligned} &\mathbb{E} \left[ \sum_{l=1}^{\mu_{n-m}} U'(H_l) - \mathbb{E}[U'(H_l)] \mid U'(H_1), \dots, U'(H_{\mu_{n-m}-1}) \right] \\ &= \sum_{l=1}^{\mu_{n-m}-1} U'(H_l) - \mathbb{E}[U'(H_l)] + \mathbb{E}[U'_{H_{\mu_{n-m}}} - \mathbb{E}[U'_{H_{\mu_{n-m}}}] \\ &= \sum_{l=1}^{\mu_{n-m}-1} U'(H_l) - \mathbb{E}[U'(H_l)]. \end{aligned}$$

We can now use the following concentration result for martingales.

**Lemma 7** ((Hayes, 2005)). *Let  $X = (X_0, \dots, X_n)$  be a discrete time martingale taking values in an Euclidean space such that  $X_0 = 0$  and for all  $i$ ,  $\|X_i - X_{i-1}\|_2 \leq B_2$  almost surely. Then for all  $\epsilon$ ,*

$$P \{ \|X_n\|_2 \geq \epsilon \} < 2e^2 e^{-\frac{\epsilon^2}{2n(B_2)^2}}.$$

Indeed, taking  $X_{\mu_{n-m}} = \sum_{l=1}^{\mu_{n-m}} U'(H_l) - \mathbb{E}[U'(H_l)]$ , and observing that  $\|X_i - X_{i-1}\| = \|U'(H_l) - \mathbb{E}[U'(H_l)]\|_2 \leq a_{n-m}C$  with  $C = \frac{2\sqrt{dkLL'}}{1-\lambda\gamma}$ , the lemma leads to

$$\begin{aligned} \mathbb{P} \left( \left\| \sum_{l=1}^{\mu_{n-m}} U'(H_l) - \mathbb{E}[U'(H_l)] \right\|_2 \geq \frac{(n-m)\epsilon}{4} \right) &\leq 2e^2 e^{-\frac{(n-m)^2\epsilon^2}{32\mu_{n-m}(a_{n-m}C)^2}} \\ &= 2e^2 e^{-\frac{(n-m)\epsilon^2}{16a_{n-m}C^2}}. \end{aligned}$$

where the second line is obtained by using the fact that  $2a_{n-m}\mu_{n-m} = n - m$ . With Equations (29) and (30), we finally obtain

$$\mathbb{P} \left( \left\| \frac{1}{n-m} \sum_{i=m}^{n-1} U_i^m - \mathbb{E}[U_i^m] \right\|_2 \geq \epsilon \right) \leq 4e^2 e^{-\frac{(n-m)\epsilon^2}{16a_{n-m}C_2^2}} + 2(n-m)\beta_{a_{n-m}}^U.$$

The vector  $U_i^m$  is a function of  $Z_i = (X_{i-m+1}, \dots, X_{i+1})$ , and Lemma 3 tells us that for all  $j > m$ ,

$$\beta_j^U \leq \beta_j^Z \leq \beta_{j-m}^X \leq \bar{\beta} e^{-b(j-m)^\kappa}.$$

So the equation above may be re-written as

$$\mathbb{P} \left( \left\| \frac{1}{n-m} \sum_{i=m}^{n-1} U_i^m - \mathbb{E}[U_i^m] \right\|_2 \geq \epsilon \right) \leq 4e^2 e^{-\frac{(n-m)\epsilon^2}{16a_{n-m}C_2^2}} + 2(n-m)\bar{\beta} e^{-b(a_{n-m}-m)^\kappa} = \delta'. \quad (31)$$

We now follow a reasoning similar to that of (Lazaric et al., 2012) in order to get the same exponent in both of the above exponentials. Taking  $a_{n-m} - m = \left[ \frac{C_2(n-m)\epsilon^2}{b} \right]^{\frac{1}{\kappa+1}}$  with  $C_2 = (16C^2\zeta)^{-1}$ , and  $\zeta = \frac{a_{n-m}}{a_{n-m}-m}$ , we have

$$\delta' \leq (4e^2 + (n-m)\bar{\beta}) \exp \left( - \min \left\{ \left( \frac{b}{(n-m)\epsilon^2 C_2} \right), 1 \right\}^{\frac{1}{\kappa+1}} \frac{1}{2} (n-m) C_2 \epsilon^2 \right). \quad (32)$$

Define

$$\Lambda(n, \delta) = \log \left( \frac{2}{\delta} \right) + \log(\max\{4e^2, n\bar{\beta}\}),$$

and

$$\epsilon(\delta) = \sqrt{2 \frac{\Lambda(n-m, \delta)}{C_2(n-m)} \max \left\{ \frac{\Lambda(n-m, \delta)}{b}, 1 \right\}^{\frac{1}{\kappa}}}.$$

It can be shown that

$$\exp \left( - \min \left\{ \left( \frac{b}{(n-m)(\epsilon(\delta))^2 C_2} \right), 1 \right\}^{\frac{1}{\kappa+1}} \frac{1}{2} (n-m) C_2 (\epsilon(\delta))^2 \right) \leq \exp(-\Lambda(n-m, \delta)). \quad (33)$$

Indeed<sup>6</sup>, there are two cases:

1. Suppose that  $\min \left\{ \left( \frac{b}{(n-m)(\epsilon(\delta))^2 C_2} \right), 1 \right\} = 1$ . Then

$$\begin{aligned} & \exp \left( - \min \left\{ \left( \frac{b}{(n-m)(\epsilon(\delta))^2 C_2} \right), 1 \right\}^{\frac{1}{\kappa+1}} \frac{1}{2} (n-m) C_2 (\epsilon(\delta))^2 \right) \\ &= \exp \left( -\Lambda(n-m, \delta) \max \left\{ \frac{\Lambda(n-m, \delta)}{b}, 1 \right\}^{\frac{1}{\kappa}} \right) \\ &\leq \exp(-\Lambda(n-m, \delta)). \end{aligned}$$

---

<sup>6</sup>This inequality exists in (Lazaric et al., 2012), and is developed here for completeness.

2. Suppose now that  $\min \left\{ \left( \frac{b}{(n-m)(\epsilon(\delta))^2 C_2} \right), 1 \right\} = \left( \frac{b}{(n-m)(\epsilon(\delta))^2 C_2} \right)$ . Then

$$\begin{aligned} & \exp \left( - \min \left\{ \left( \frac{b}{(n-m)(\epsilon(\delta))^2 C_2} \right), 1 \right\}^{\frac{1}{k+1}} \frac{1}{2} (n-m) C_2 (\epsilon(\delta))^2 \right) \\ &= \exp \left( - \frac{1}{2} b^{\frac{1}{k+1}} ((n-m) C_2 (\epsilon(\delta))^2)^{\frac{k}{k+1}} \right) \\ &= \exp \left( - \frac{1}{2} b^{\frac{1}{k+1}} (\Lambda(n-m, \delta))^{\frac{k}{k+1}} \max \left\{ \frac{\Lambda(n-m, \delta)}{b}, 1 \right\}^{\frac{1}{k+1}} \right) \\ &= \exp \left( - \frac{1}{2} \Lambda(n-m, \delta)^{\frac{k}{k+1}} \max \{ \Lambda(n-m, \delta), b \}^{\frac{1}{k+1}} \right) \\ &\leq \exp(-\Lambda(n-m, \delta)). \end{aligned}$$

By combining Equations (32) and (33), we get

$$\delta' \leq (4e^2 + (n-m)\bar{\beta}) \exp(-\Lambda(n-m, \delta)).$$

If we replace  $\Lambda(n-m, \delta)$  with its expression, we obtain

$$\exp(-\Lambda(n-m, \delta)) = \frac{\delta}{2} \max\{4e^2, (n-m)\bar{\beta}\}^{-1}.$$

Since  $4e^2 \max\{4e^2, (n-m)\bar{\beta}\}^{-1} \leq 1$  and  $(n-m)\bar{\beta} \max\{4e^2, (n-m)\bar{\beta}\}^{-1} \leq 1$ , we consequently have

$$\delta' \leq 2 \frac{\delta}{2} \leq \delta.$$

Now, note that since  $a_{n-m} - m \geq 1$ , we have

$$\zeta = \frac{a_{n-m}}{a_{n-m} - m} = \frac{a_{n-m} - m + m}{a_{n-m} - m} \leq 1 + m.$$

Let  $J(n, \delta) = 32\Lambda(n, \delta) \max \left\{ \frac{\Lambda(n, \delta)}{b}, 1 \right\}^{\frac{1}{k}}$ . Then Equation (31) is reduced to

$$\mathbb{P} \left( \left\| \frac{1}{n-m} \sum_{i=m}^{n-1} (U_i^m - \mathbb{E}[U_i^m]) \right\|_2 \geq \frac{C}{\sqrt{n-m}} (\zeta J(n-m, \delta))^{\frac{1}{2}} \right) \leq \delta. \quad (34)$$

Since  $J(n, \delta)$  is an increasing function on  $n$ , and  $\frac{n-1}{\sqrt{n-1}(n-m)} = \frac{1}{\sqrt{n-m}} \sqrt{\frac{n-1}{n-m}} \geq \frac{1}{\sqrt{n-m}}$ , we have

$$\begin{aligned} & \mathbb{P} \left( \left\| \frac{1}{n-1} \sum_{i=m}^{n-1} (G_i^m - \mathbb{E}[G_i^m]) \right\|_2 \geq \frac{C}{\sqrt{n-1}} (\zeta J(n-1, \delta))^{\frac{1}{2}} \right) \\ &\leq \mathbb{P} \left( \left\| \frac{1}{n-m} \sum_{i=m}^{n-1} (G_i^m - \mathbb{E}[G_i^m]) \right\|_2 \geq \frac{C}{\sqrt{n-1}} \frac{n-1}{n-m} ((m+1)J(n-1, \delta))^{\frac{1}{2}} \right) \\ &\leq \mathbb{P} \left( \left\| \frac{1}{n-m} \sum_{i=m}^{n-1} (G_i^m - \mathbb{E}[G_i^m]) \right\|_2 \geq \frac{C}{\sqrt{n-m}} ((m+1)J(n-m, \delta))^{\frac{1}{2}} \right). \end{aligned}$$

By using Equations (25) and (34), we deduce that

$$\mathbb{P} \left( \left\| \frac{1}{n-1} \sum_{i=m}^{n-1} (G_i^m - \mathbb{E}[G_i^m]) \right\|_2 \geq \frac{C}{\sqrt{n-1}} ((m+1)J(n-1, \delta))^{\frac{1}{2}} \right) \leq \delta. \quad (35)$$

By combining Equations (23), (24) and (35), plugging the value of  $C = \frac{2\sqrt{dk}LL'}{1-\lambda\gamma}$ , and taking  $m = \left\lceil \frac{\log(n-1)}{\log \frac{1}{\lambda\gamma}} \right\rceil$ —so that  $\|\epsilon_1 + \epsilon_2\|_2 \leq \epsilon(n)$ —, we get the announced result.

## B. Proof of Theorem 3

We prove here the following result: for any  $\delta \in (0, 1)$ , for all  $n \geq 1$ , consider  $\hat{v}_{LSTD(\lambda)}^\rho = \Phi \hat{\theta}_\rho$  with penalization parameter  $\rho = 2\Xi^2(n, \delta)$ . Then, with at least probability  $1 - \delta$ , for all  $n$ ,

$$\|\hat{v}_{LSTD(\lambda)}^\rho - v_{LSTD(\lambda)}\|_\mu \leq \frac{4V_{\max}\sqrt{dL}(3 + \sqrt{dL})}{\sqrt{n-1}(1-\gamma)\sqrt{v}} \sqrt{(m_n^\lambda + 1)I(n-1, \delta) + g(n, \delta)},$$

where  $g(n, \delta)$  and  $I(n, \delta)$  are defined as in Theorem 1.

*Proof.* Let  $\hat{\theta}_\rho$  be the vector that satisfies

$$\hat{\theta}_\rho = \arg \min_{\theta \in \mathbb{R}^d} \left\{ \|\hat{A}\theta_\rho - \hat{b}\|_2^2 + \rho \|\theta_\rho\|_2^2 \right\}. \quad (36)$$

We have

$$\|A\hat{\theta}_\rho - b\|_2 \leq \|\epsilon_A\|_2 \|\hat{\theta}_\rho\|_2 + \|\epsilon_b\|_2 + \|\hat{A}\hat{\theta}_\rho - \hat{b}\|_2.$$

Then by using the inequality  $(a + b)^2 \leq 2(a^2 + b^2)$  twice on  $\underbrace{\|\epsilon_A\|_2 \|\hat{\theta}_\rho\|_2 + \|\epsilon_b\|_2}_a$  and then on

$\underbrace{\|\epsilon_A\|_2 \|\hat{\theta}_\rho\|_2}_a + \underbrace{\|\epsilon_b\|_2}_b$  we have

$$\|A\hat{\theta}_\rho - b\|_2^2 \leq 4\|\epsilon_A\|_2^2 \|\hat{\theta}_\rho\|_2^2 + 4\|\epsilon_b\|_2^2 + 2\|\hat{A}\hat{\theta}_\rho - \hat{b}\|_2^2.$$

From Equation (36) we can write that

$$\begin{aligned} \left\{ \|\hat{A}\hat{\theta}_\rho - \hat{b}\|_2^2 + \rho \|\hat{\theta}_\rho\|_2^2 \right\} &= \min_{\theta \in \mathbb{R}^d} \left\{ \|\hat{A}\theta - \hat{b}\|_2^2 + \rho \|\theta\|_2^2 \right\} \\ \|\hat{\theta}_\rho\|_2^2 &= \frac{1}{\rho} \min_{\theta \in \mathbb{R}^d} \left\{ \|\hat{A}\theta - \hat{b}\|_2^2 + \rho \|\theta\|_2^2 - \|\hat{A}\hat{\theta}_\rho - \hat{b}\|_2^2 \right\}, \end{aligned}$$

and

$$\begin{aligned} \|\hat{A}\hat{\theta}_\rho - \hat{b}\|_2^2 &= \min_{\theta \in \mathbb{R}^d} \left\{ \|\hat{A}\theta - \hat{b}\|_2^2 + \rho(\|\theta\|_2^2 - \|\hat{\theta}_\rho\|_2^2) \right\} \\ &\leq \min_{\theta \in \mathbb{R}^d} \left\{ \|\hat{A}\theta - \hat{b}\|_2^2 + \rho \|\theta\|_2^2 \right\}. \end{aligned}$$

So that

$$\begin{aligned} \|A\hat{\theta}_\rho - b\|_2^2 &\leq 4 \frac{\|\epsilon_A\|_2^2}{\rho} \min_{\theta \in \mathbb{R}^d} \left\{ \|\hat{A}\theta - \hat{b}\|_2^2 + \rho \|\theta\|_2^2 - \|\hat{A}\hat{\theta}_\rho - \hat{b}\|_2^2 \right\} + 4\|\epsilon_b\|_2^2 + 2\|\hat{A}\hat{\theta}_\rho - \hat{b}\|_2^2 \\ &\leq 4 \frac{\|\epsilon_A\|_2^2}{\rho} \min_{\theta \in \mathbb{R}^d} \left\{ \|\hat{A}\theta - \hat{b}\|_2^2 + \rho \|\theta\|_2^2 \right\} + \max \left( 0, 2 - 4 \frac{\|\epsilon_A\|_2^2}{\rho} \right) \|\hat{A}\hat{\theta}_\rho - \hat{b}\|_2^2 + 4\|\epsilon_b\|_2^2 \\ &\leq \max \left( 4 \frac{\|\epsilon_A\|_2^2}{\rho}, 2 \right) \min_{\theta \in \mathbb{R}^d} \left\{ \|\hat{A}\theta - \hat{b}\|_2^2 + \rho \|\theta\|_2^2 \right\} + 4\|\epsilon_b\|_2^2. \end{aligned}$$

In Section 4.3, we derived high-probability bounds on  $\|\epsilon_A\|_2$  and  $\|\hat{A}\theta^* - \hat{b}\|_2 = \|\epsilon_A\theta^* - \epsilon_b\|_2$  with  $\theta^* = A^{-1}b$ . It is easy to also derive a high-probability bound on  $\|\epsilon_b\|_2^2$ . More precisely, with the definitions of  $\epsilon_1$  and  $\epsilon_2$  given in Equations (17) and (21), and with  $\epsilon_3(n, \delta_n) = \frac{2\sqrt{dL}^2}{(1-\lambda\gamma)\sqrt{n-1}} \sqrt{(m_n^\lambda + 1)J(n-1, \delta_n) + \tilde{O}(\frac{1}{n})}$ , we know that with probability at least  $1 - \delta$ ,

$$\|\epsilon_A\|_2 \leq \epsilon_1(n, \delta_n), \quad \|\epsilon_A\theta^* - \epsilon_b\|_2 \leq \epsilon_2(n, \delta_n) \quad \text{and} \quad \|\epsilon_b\|_2 \leq \epsilon_3(n, \delta_n).$$

As a consequence,

$$\|A\hat{\theta}_\rho - b\|_2^2 \leq \max \left( 4 \frac{\|\epsilon_A\|_2^2}{\rho}, 2 \right) \{ (\epsilon_2(n, \delta_n)^2 + \rho) \|\theta^*\|_2^2 \} + 4\|\epsilon_b\|_2^2.$$

With  $\rho = 2(\epsilon_1(n, \delta_n))^2$ , we obtain with probability at  $1 - \delta$ ,

$$\|A\hat{\theta}_\rho - b\|_2^2 \leq 2(2(\epsilon_1(n, \delta_n))^2 + (\epsilon_2(n, \delta_n))^2)\|\theta^*\|_2^2 + 4(\epsilon_3(n, \delta_n))^2$$

By using the fact that  $\sqrt{a+b} \leq \sqrt{a} + \sqrt{b}$ , this implies

$$\|A\hat{\theta}_\rho - b\|_2 \leq \sqrt{2(2\epsilon_1(n, \delta_n) + \epsilon_2(n, \delta_n))\|\theta^*\|_2} + 2(\epsilon_3(n, \delta_n))$$

We conclude by using Equation (8) in which we take the norm, by bounding  $\|\Phi A^{-1}\|_\mu$  in the same way as we did in the proof of Lemma 1, and finish in the way similar to the unregularized proof with  $\delta_n = \frac{\delta}{6n^2}$ .  $\square$
